# Supplementary material
Source: PubMed Central journal article supplement (PMC5656474)
Supplement: jcsm.13.11.1255s1.pdf [file jcsm.13.11.1255s1.pdf]

|                                   |                |                             | Self-Report Adherence<br>(N = 1,963) |                           | Objective Adherence<br>(N = 1,011) |                           |
|-----------------------------------|----------------|-----------------------------|--------------------------------------|---------------------------|------------------------------------|---------------------------|
|                                   |                | All Patients<br>(N = 2,027) | Adherent<br>(N = 1,594)              | Not Adherent<br>(N = 369) | Adherent<br>(N = 704)              | Not Adherent<br>(N = 307) |
| EQ-5D<br>Mobility                 | Pre-PAP Score  | 1.27 (0.45)                 | 1.26 (0.45)                          | 1.30 (0.46)               | 1.18 (0.39)                        | 1.24 (0.45)               |
|                                   | Post-PAP Score | 1.26 (0.45)                 | 1.24 (0.44)                          | 1.34 (0.49)               | 1.18 (0.39)                        | 1.29 (0.46)               |
|                                   | Change         | -0.01 (0.40)                | -0.02 (0.40)                         | 0.04 (0.43)               | -0.01 (0.36)                       | 0.04 (0.40)               |
|                                   | Effect Size    | -0.02                       | -0.04                                | 0.08                      | -0.02                              | 0.10                      |
| EQ-5D<br>Self<br>Care             | Pre-PAP Score  | 1.09 (0.30)                 | 1.08 (0.28)                          | 1.14 (0.37)               | 1.06 (0.25)                        | 1.10 (0.32)               |
|                                   | Post-PAP Score | 1.08 (0.28)                 | 1.07 (0.27)                          | 1.13 (0.35)               | 1.06 (0.23)                        | 1.12 (0.34)               |
|                                   | Change         | -0.01 (0.24)                | -0.01 (0.23)                         | -0.01 (0.28)              | -0.01 (0.17)                       | 0.02 (0.29)               |
|                                   | Effect Size    | -0.03                       | -0.03                                | -0.03                     | -0.02                              | 0.05                      |
| EQ-5D<br>Usual<br>Activities      | Pre-PAP Score  | 1.39 (0.54)                 | 1.37 (0.53)                          | 1.44 (0.57)               | 1.29 (0.48)                        | 1.40 (0.55)               |
|                                   | Post-PAP Score | 1.34 (0.53)                 | 1.32 (0.51)                          | 1.46 (0.59)               | 1.25 (0.46)                        | 1.37 (0.55)               |
|                                   | Change         | -0.05 (0.46)                | -0.06 (0.45)                         | 0.01 (0.48)               | -0.04 (0.41)                       | -0.03 (0.46)              |
|                                   | Effect Size    | -0.08                       | -0.11                                | 0.02                      | -0.09                              | -0.05                     |
| EQ-5D<br>Pain                     | Pre-PAP Score  | 1.61 (0.60)                 | 1.59 (0.60)                          | 1.64 (0.63)               | 1.52 (0.55)                        | 1.59 (0.62)               |
|                                   | Post-PAP Score | 1.57 (0.61)                 | 1.54 (0.60)                          | 1.67 (0.65)               | 1.47 (0.56)                        | 1.61 (0.64)               |
|                                   | Change         | -0.04 (0.54)                | -0.05 (0.53)                         | 0.04 (0.54)               | -0.05 (0.51)                       | 0.02 (0.53)               |
|                                   | Effect Size    | -0.06                       | -0.09                                | 0.06                      | -0.09                              | 0.03                      |
| EQ-5D<br>Anxiety/<br>Depression   | Pre-PAP Score  | 1.44 (0.57)                 | 1.42 (0.57)                          | 1.52 (0.59)               | 1.37 (0.53)                        | 1.41 (0.57)               |
|                                   | Post-PAP Score | 1.37 (0.55)                 | 1.34 (0.53)                          | 1.51 (0.61)               | 1.32 (0.51)                        | 1.39 (0.57)               |
|                                   | Change         | -0.07 (0.50)                | -0.08 (0.50)                         | -0.01 (0.51)              | -0.05 (0.46)                       | -0.01 (0.46)              |
|                                   | Effect Size    | -0.12                       | -0.15                                | -0.02                     | -0.10                              | -0.02                     |
| FOSQ<br>General<br>Productivity   | Pre-PAP Score  | 3.37 (0.66)                 | 3.40 (0.64)                          | 3.23 (0.70)               | 3.43 (0.60)                        | 3.35 (0.70)               |
|                                   | Post-PAP Score | 3.54 (0.61)                 | 3.60 (0.56)                          | 3.30 (0.72)               | 3.65 (0.51)                        | 3.42 (0.71)               |
|                                   | Change         | 0.17 (0.49)                 | 0.20 (0.49)                          | 0.08 (0.51)               | 0.22 (0.49)                        | 0.06 (0.48)               |
|                                   | Effect Size    | 0.26                        | 0.31                                 | 0.11                      | 0.36                               | 0.09                      |
| FOSQ<br>Social<br>Outcome         | Pre-PAP Score  | 3.39 (0.87)                 | 3.43 (0.85)                          | 3.22 (0.94)               | 3.46 (0.83)                        | 3.35 (0.93)               |
|                                   | Post-PAP Score | 3.56 (0.78)                 | 3.62 (0.73)                          | 3.33 (0.93)               | 3.65 (0.71)                        | 3.43 (0.88)               |
|                                   | Change         | 0.17 (0.85)                 | 0.19 (0.83)                          | 0.10 (0.92)               | 0.19 (0.82)                        | 0.08 (0.90)               |
|                                   | Effect Size    | 0.20                        | 0.23                                 | 0.11                      | 0.24                               | 0.09                      |
| FOSQ<br>Activity<br>Level         | Pre-PAP Score  | 2.92 (0.81)                 | 2.95 (0.80)                          | 2.79 (0.84)               | 3.00 (0.77)                        | 2.91 (0.83)               |
|                                   | Post-PAP Score | 3.20 (0.75)                 | 3.26 (0.71)                          | 2.94 (0.85)               | 3.32 (0.66)                        | 3.09 (0.81)               |
|                                   | Change         | 0.27 (0.63)                 | 0.31 (0.63)                          | 0.15 (0.59)               | 0.33 (0.60)                        | 0.18 (0.64)               |
|                                   | Effect Size    | 0.34                        | 0.38                                 | 0.18                      | 0.42                               | 0.21                      |
| FOSQ<br>Vigilance                 | Pre-PAP Score  | 3.20 (0.77)                 | 3.22 (0.76)                          | 3.11 (0.82)               | 3.26 (0.74)                        | 3.21 (0.78)               |
|                                   | Post-PAP Score | 3.44 (0.69)                 | 3.49 (0.65)                          | 3.25 (0.80)               | 3.54 (0.60)                        | 3.36 (0.74)               |
|                                   | Change         | 0.24 (0.66)                 | 0.27 (0.67)                          | 0.14 (0.63)               | 0.29 (0.64)                        | 0.14 (0.63)               |
|                                   | Effect Size    | 0.31                        | 0.35                                 | 0.17                      | 0.39                               | 0.18                      |
| FOSQ<br>Intimate<br>Relationships | Pre-PAP Score  | 2.66 (1.25)                 | 2.67 (1.25)                          | 2.56 (1.26)               | 2.74 (1.23)                        | 2.76 (1.27)               |
|                                   | Post-PAP Score | 2.78 (1.30)                 | 2.84 (1.28)                          | 2.51 (1.32)               | 2.91 (1.27)                        | 2.76 (1.30)               |
|                                   | Change         | 0.12 (1.11)                 | 0.17 (1.12)                          | -0.06 (1.05)              | 0.17 (1.08)                        | 0.00 (1.15)               |
|                                   | Effect Size    | 0.10                        | 0.14                                 | -0.04                     | 0.14                               | 0.00                      |
